# Supplementary material for: Superoxide differentially controls pulmonary and systemic vascular tone through multiple signalling pathways
Source: PubMed Central journal article supplement — Cardiovasc Res. 2010 Aug 30;89(1):214–24. doi: 10.1093/cvr/cvq275 (PMC3002873; doi:10.1093/cvr/cvq275), 2010-08-30
Supplement: supp_cvq275_cvq275supp.pdf [file supp_cvq275_cvq275supp.pdf]

SUPPLEMENTARY DATA (Figures S1-S4)

Figure S1: Constriction/relaxation responses to LY83583 in mesenteric and pulmonary arteries: effects of NOS inhibition.

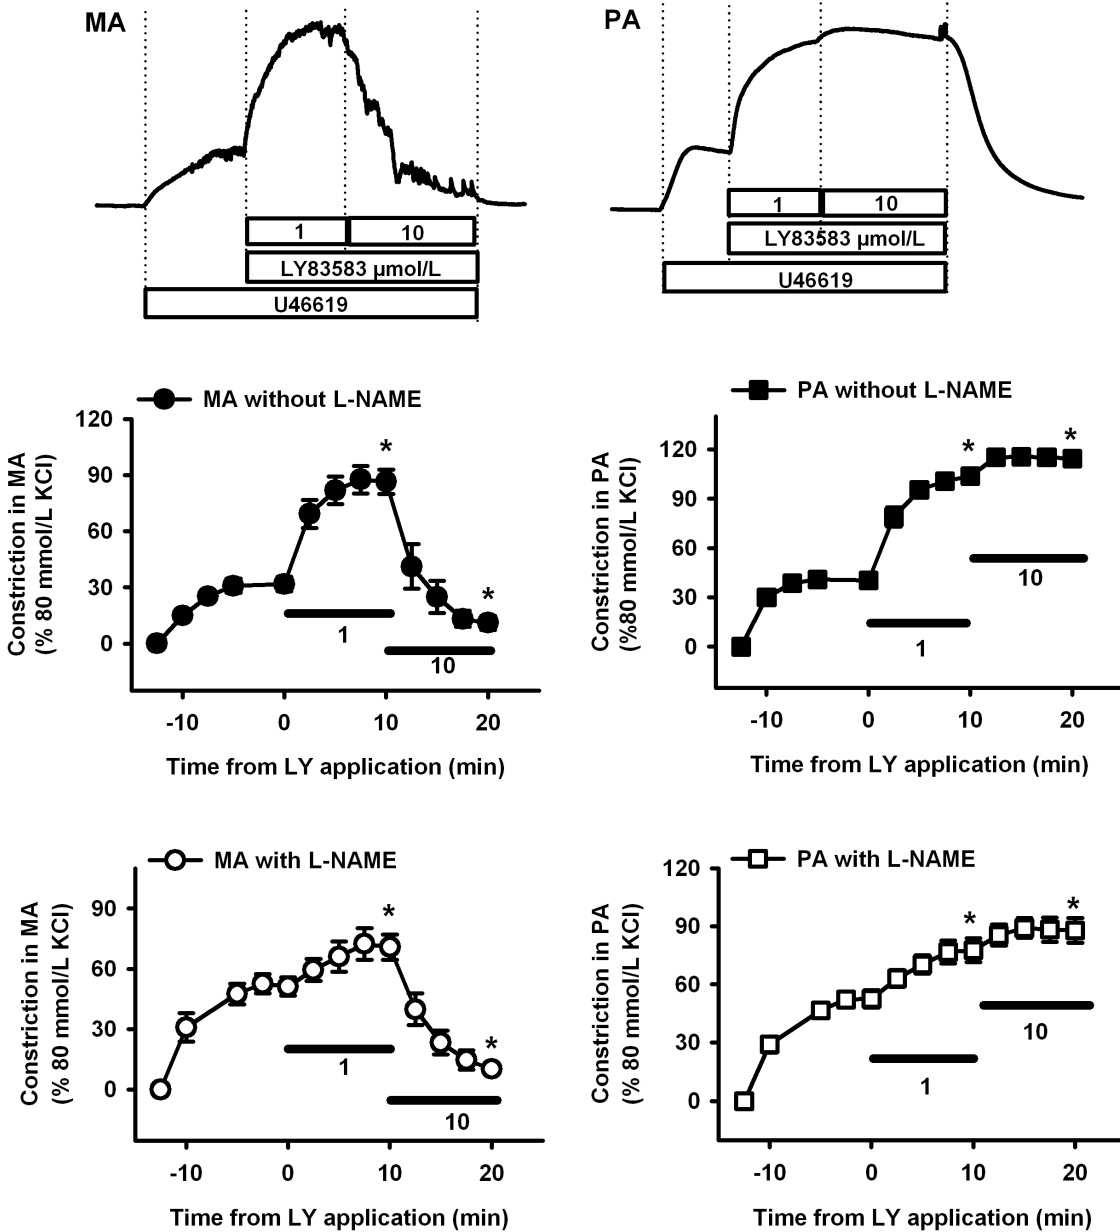

**Traces:** Effects of cumulative 1 and 10  $\mu\text{mol/L}$  LY83583 on mesenteric (MA) and pulmonary (PA) arteries pre-constricted with 100 nmol/L U46619. **Plots:** Average effects in the absence (solid symbols) and continuous presence (open symbols) of 1 mmol/L L-NAME,  $n = 4-5$ . Although L-NAME enhances relative amplitude of U46619 pre-constriction, 1  $\mu\text{mol/L}$  LY83583 still causes further constriction in both MA and PA and 10  $\mu\text{mol/L}$  still relaxes in MA. \*Denotes significant enhancement or inhibition compared to the zero time-point ( $P < 0.05$ ).

**Figure S2: Effect of LY83583 on U46619-induced constriction in  $\alpha$ -toxin permeabilized MA.**

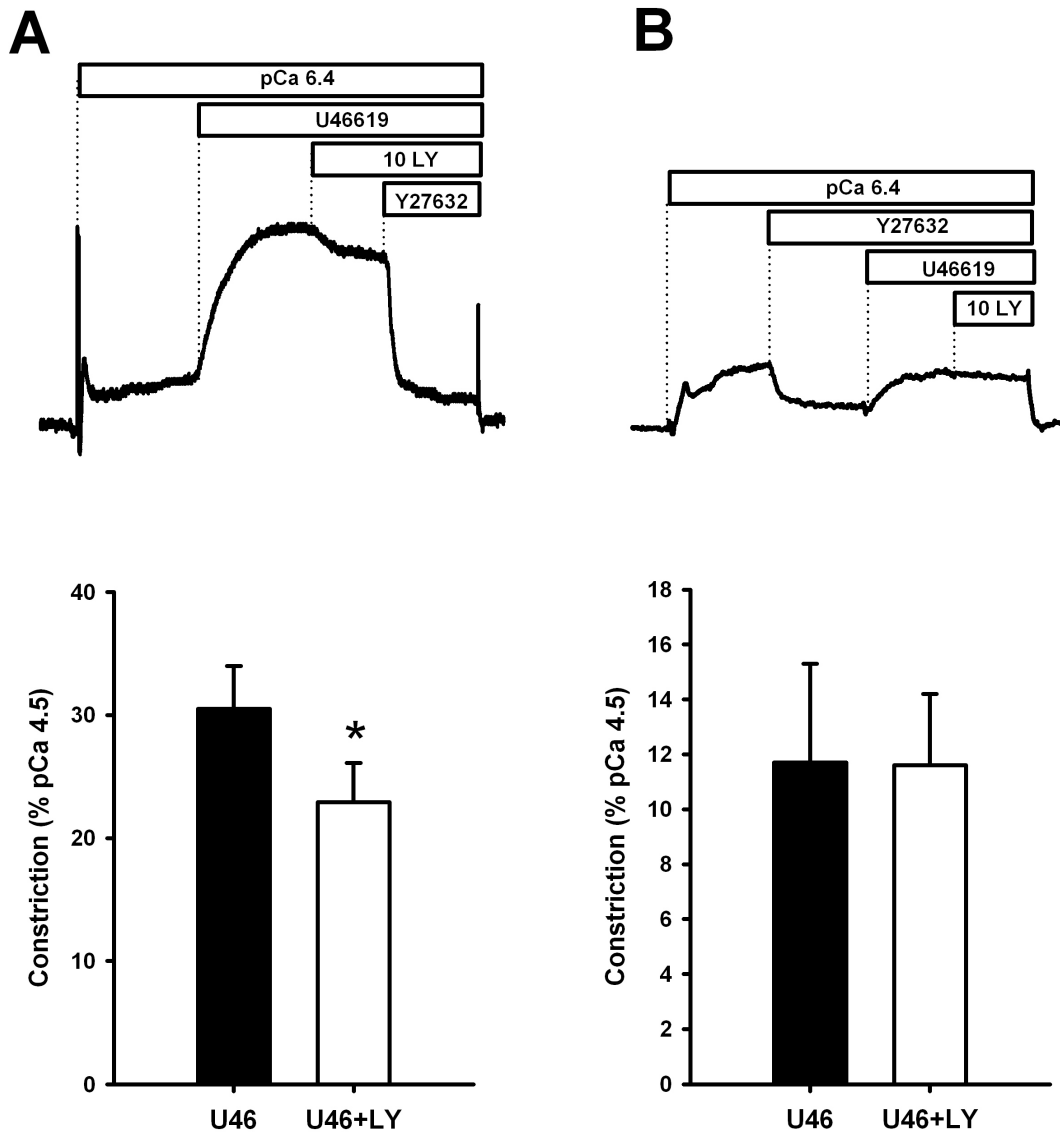

**A:**  $\text{Ca}^{2+}$ -induced constriction in  $\alpha$ -toxin permeabilized MA (pCa 6.4). U46619 causes further constriction and this is only partially reversed by 10  $\mu\text{mol/L}$  LY83583, but is very sensitive to Rho-kinase inhibitor Y27632 (10  $\mu\text{mol/L}$ ). **B:** Upon prior treatment with Y27632, U46619 still causes some constriction but LY83583 is without effect. **Bar charts:** Summary data showing small but significant relaxation induced by LY83583 in absence (A, \* $P < 0.05$ ,  $n = 9$ ) but not presence of Y27632 (B,  $n = 11$ ).

**Figure S3: Enhancement of 30mmol/L KCl-induced constriction by LY83583: effects of Rho-kinase and protein kinase C inhibition**

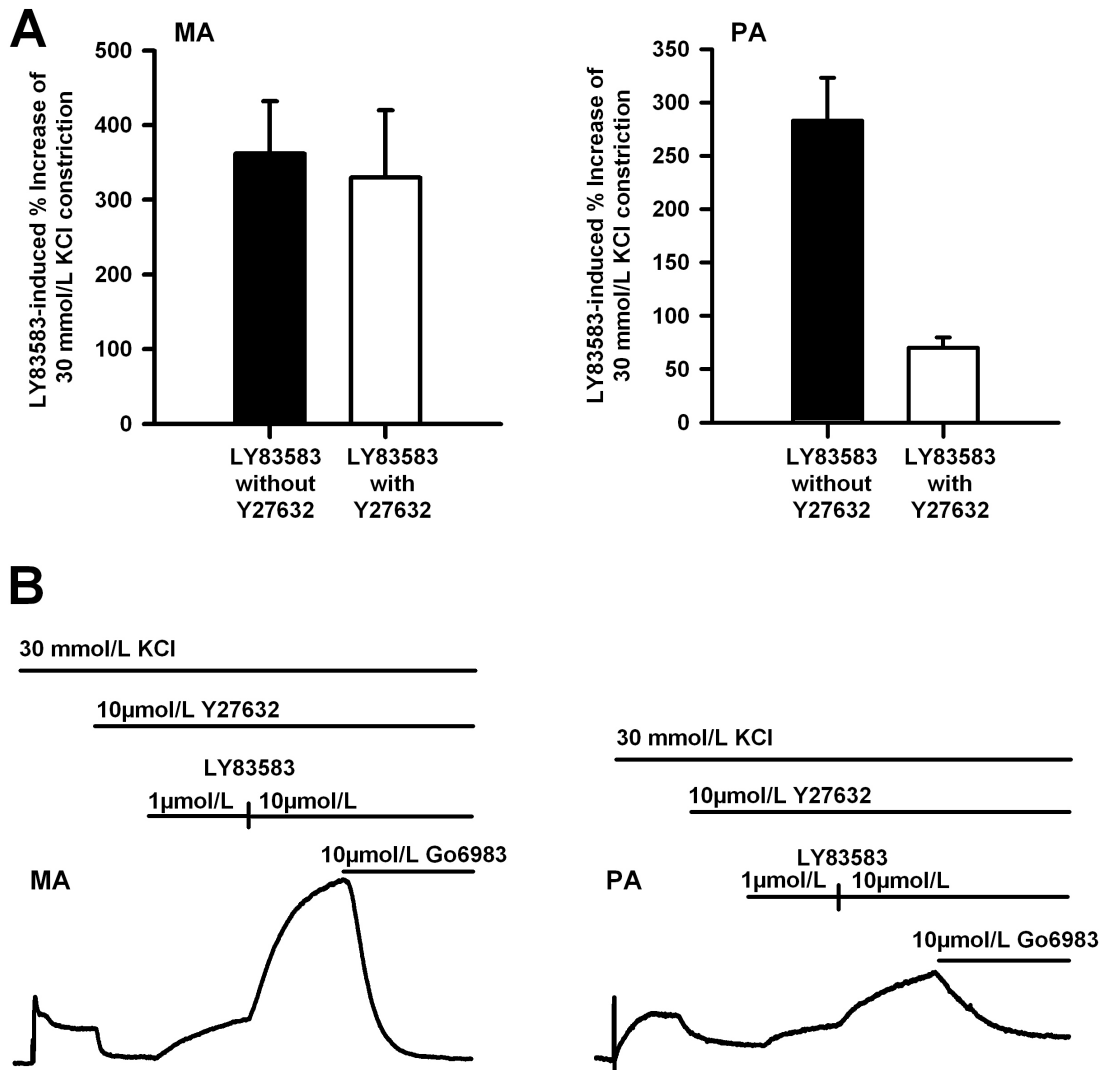

**A:** Influence of the Rho-kinase inhibitor Y27632 on 10 μmol/L LY83583-mediated enhancement of 30mmol/L KCl-induced constriction in mesenteric (MA, n=4) and pulmonary (PA, n=4) arteries. **B:** LY83583-induced constriction remaining in presence of Y27632 is abolished by application of the PKC inhibitor Gö6983 in both MA and PA (traces representative of n=4).

**Figure S4: Effects of prior guanylyl cyclase inhibition on responses to LY83583**

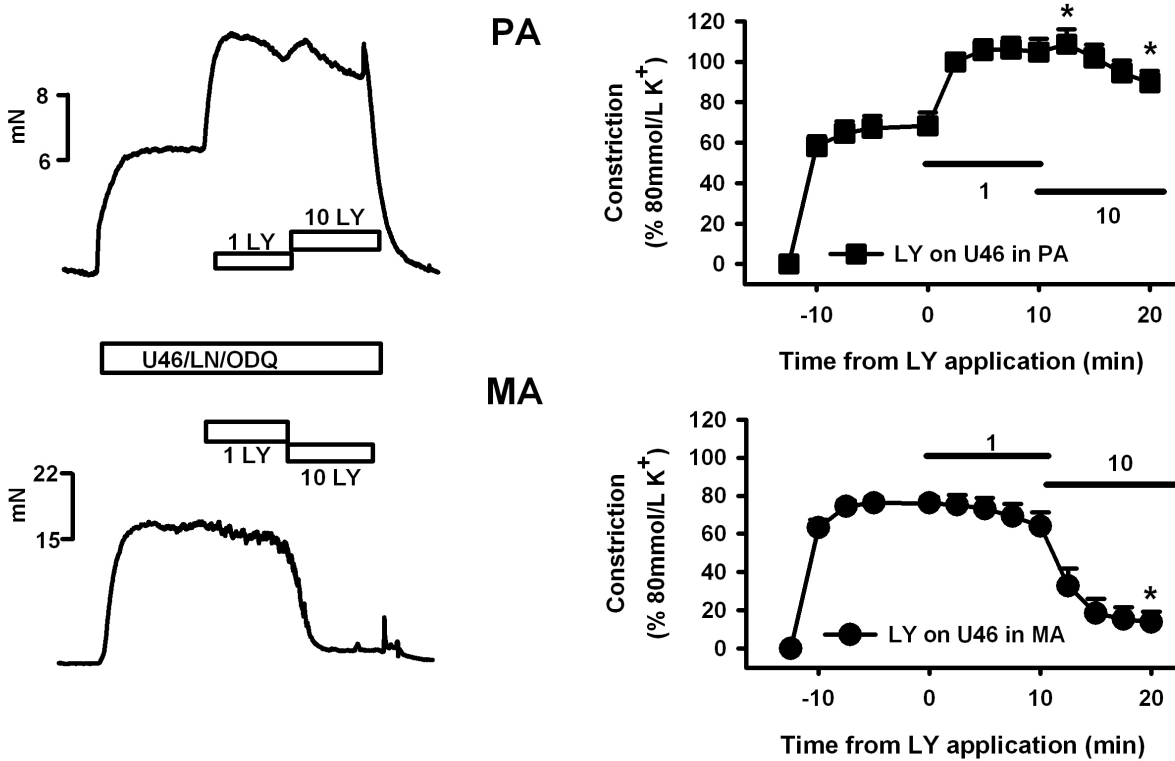

Influence of prior treatment with guanylate cyclase inhibitor ODQ (10 $\mu$ mol/L) on LY83583-induced responses in PA (top) and MA (bottom). When pre-constricted with U46619/L-NAME (range 10-100 nmol/L), LY83583 caused constriction at both 1 and 10 $\mu$ mol/L in PA (n=8), whereas in MA, 1 $\mu$ mol/L LY83583 was without effect and 10 $\mu$ mol/L caused relaxation (n=9). \*Denotes significant enhancement or inhibition compared to the zero time-point (P<0.05).
